# Supplementary material for: Assessment of Low Global Warming Potential Refrigerants for Drop-In Replacement by Connecting their Molecular Features to Their Performance
Source: PubMed Central journal article supplement (PMC8693772; doi:10.1021/acssuschemeng.1c05985), 2021-12-07
Supplement: sc1c05985_si_001.pdf [file sc1c05985_si_001.pdf]

## Supporting Information

### Assessment of low Global Warming Potential Refrigerants for drop-in Replacement by Connecting their Molecular Features to their Performance

Carlos G. Albà<sup>†‡</sup>, Ismail I.I. Alkhatib<sup>†</sup>, Fèlix Llovell<sup>‡\*</sup>, Lourdes F. Vega<sup>†\*</sup>

<sup>†</sup>Research and Innovation Center on CO<sub>2</sub> and H<sub>2</sub> (RICH), Chemical Engineering Department, Khalifa University, PO Box 127788, Abu Dhabi, United Arab Emirates.

<sup>‡</sup>Department of Chemical Engineering, ETSEQ, Universitat Rovira i Virgili (URV), Av. Països Catalans 26, 43007, Tarragona, Spain.

Corresponding authors e-mail addresses:

Lourdes F. Vega: [lourdes.vega@ku.ac.ae](mailto:lourdes.vega@ku.ac.ae)

Fèlix Llovell: [felix.llovell@urv.cat](mailto:felix.llovell@urv.cat)

Number of figures: 8 (Figures S1-S8)

Number of tables: 2 (Table S1-S2)

Number of pages: 9 (S1-S9)

**Table S1.** Environmental, and Safety for refrigerants examined in this work included in **Table 1.**<sup>1-8</sup>

| <b>Substance</b> | <b>GWP</b> | <b>ODP</b> | <b>Toxicity</b> | <b>Flammability</b> |
|------------------|------------|------------|-----------------|---------------------|
| R41              | 116        | 0          | A               | 2                   |
| R32              | 677        | 0          | A               | 2L                  |
| R23              | 12400      | 0          | A               | 1                   |
| R161             | 4          | 0          | A               | 2                   |
| R152a            | 138        | 0          | A               | 2                   |
| R134a            | 1300       | 0          | A               | 1                   |
| R125             | 3170       | 0          | A               | 1                   |
| R245fa           | 858        | 0          | B               | 1                   |
| R236fa           | 8060       | 0          | A               | 1                   |
| R227ea           | 3350       | 0          | A               | 1                   |
| R1123            | 3          | 0          | A               | 1                   |
| R1243zf          | 1          | 0          | A               | 2                   |
| R1234yf          | 0          | 0          | A               | 2L                  |
| R1234ze(E)       | 1          | 0          | A               | 2L                  |
| R1225ye(Z)       | 3          | 0          | A               | 1                   |
| R1336mzz(Z)      | 2          | 0          | A               | 1                   |
| R1233zd(E)       | 5          | 0.00024    | A               | 1                   |
| R1224yd(Z)       | 1          | 0.00023    | A               | 1                   |

**Table S2.** Soft-SAFT molecular parameters of *n*-alkanes used in this work, as transferred from previous work.<sup>9</sup>

| <b>Substance</b> | <b><i>m</i></b> | <b><math>\sigma</math> (Å)</b> | <b><math>\varepsilon/k_B</math> (K)</b> |
|------------------|-----------------|--------------------------------|-----------------------------------------|
| Ethane           | 1.392           | 3.728                          | 147.2                                   |
| <i>n</i> -butane | 2.134           | 3.871                          | 237.7                                   |

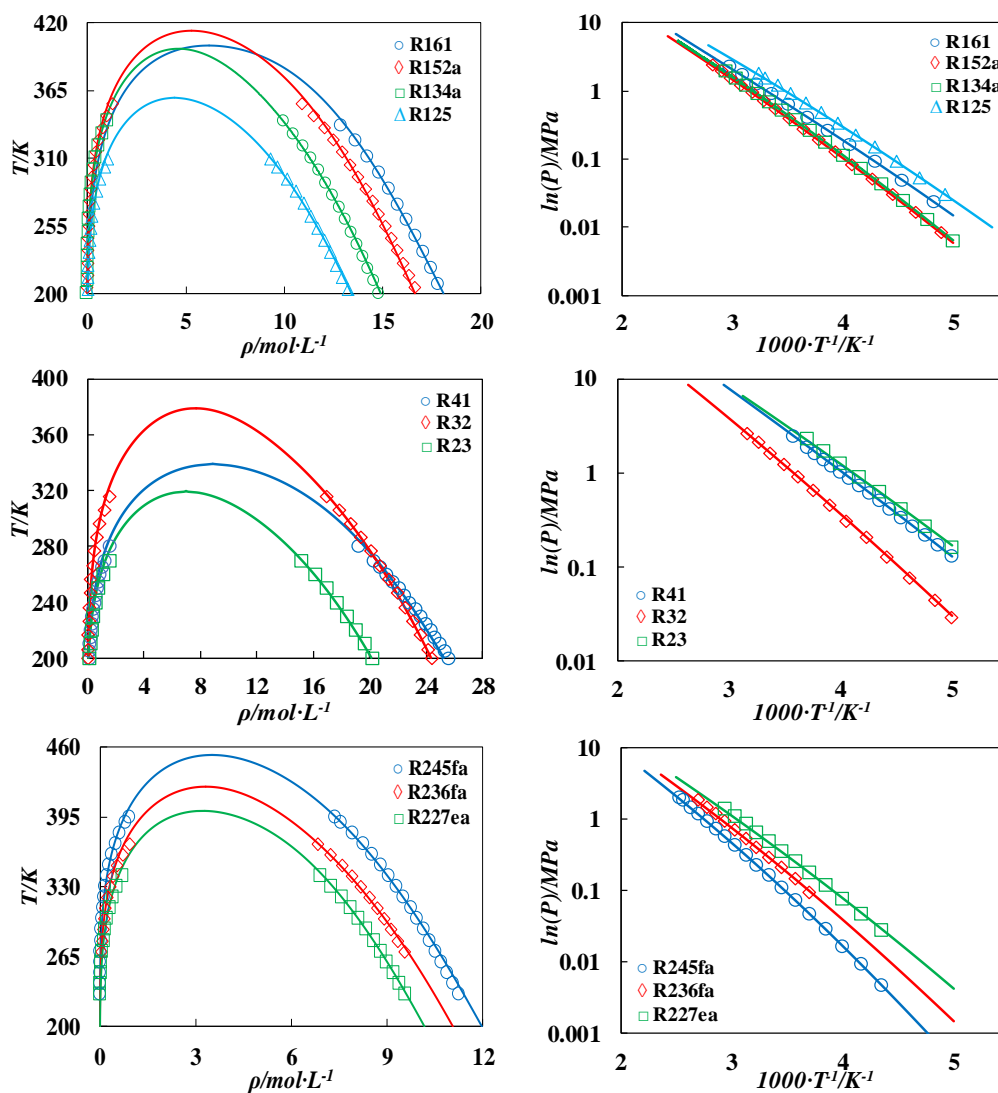

**Fig. S1.** Vapor pressure (right), and coexisting densities (left) for 3<sup>rd</sup> generation refrigerants studied in this work, with polar soft-SAFT EoS (solid lines), compared to experimental data<sup>2,10</sup> (symbols).

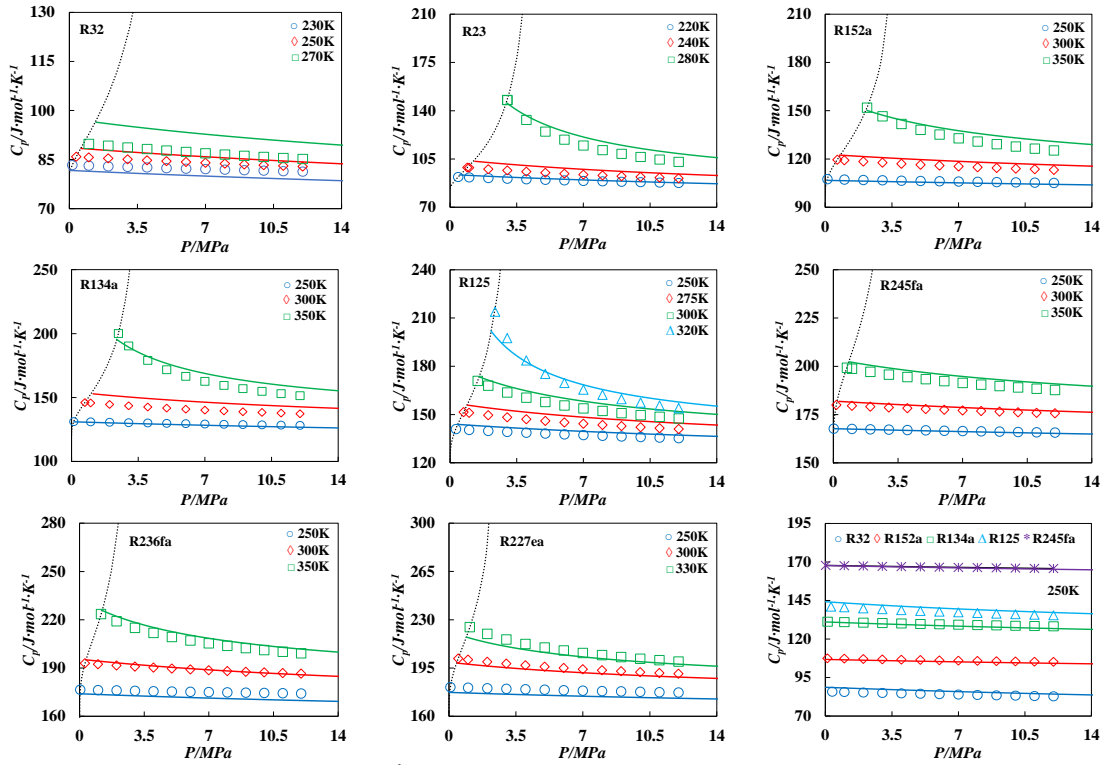

**Fig. S2.** Isobaric heat capacities of 3<sup>rd</sup> generation refrigerants predicted with polar soft-SAFT EoS (solid lines), compared to experimental data<sup>2,11–13</sup> (symbols).

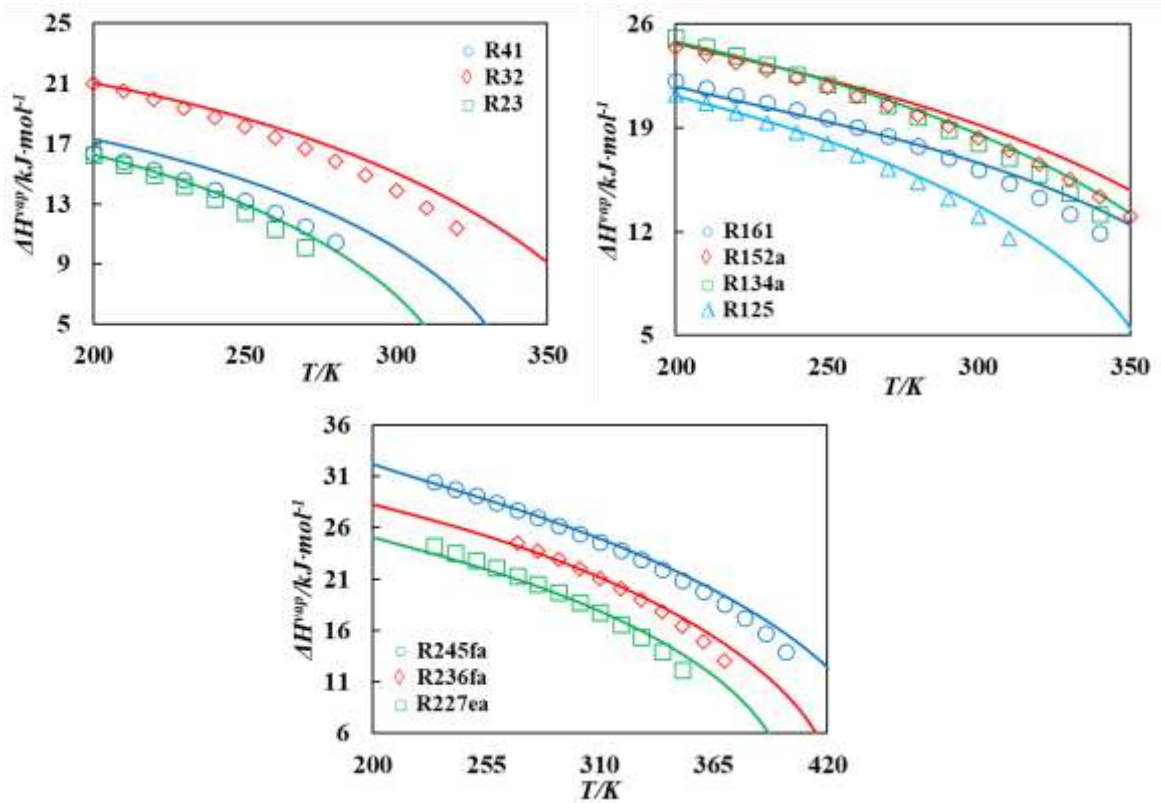

**Fig. S3.** Enthalpy of vaporization of 3<sup>rd</sup> generation refrigerants predicted with polar soft-SAFT EoS (solid lines), compared to experimental data<sup>2</sup> (symbols).

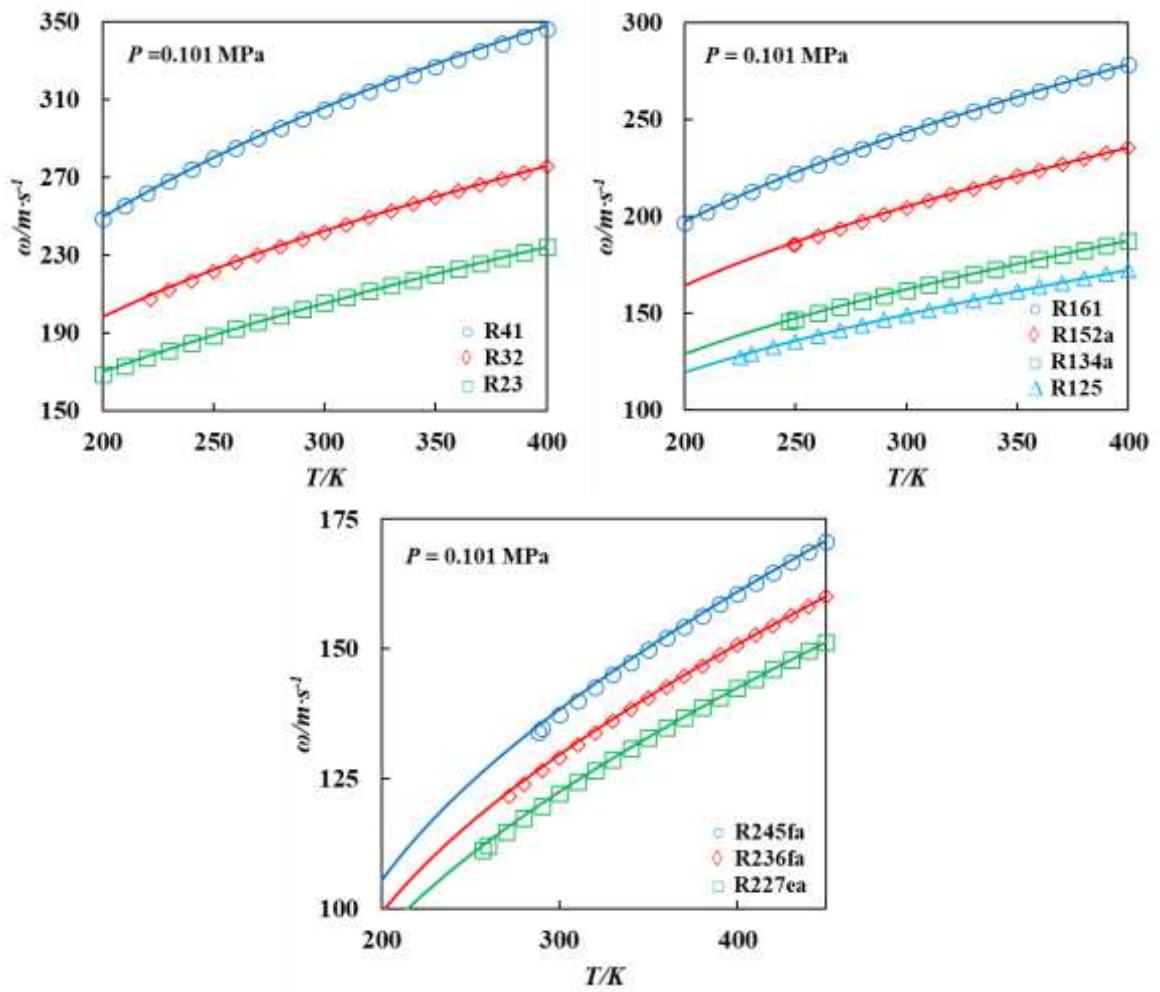

**Fig. S4.** Speed of sound of 3<sup>rd</sup> generation refrigerants predicted with polar soft-SAFT EoS (solid lines), compared to experimental data<sup>2</sup> (symbols).

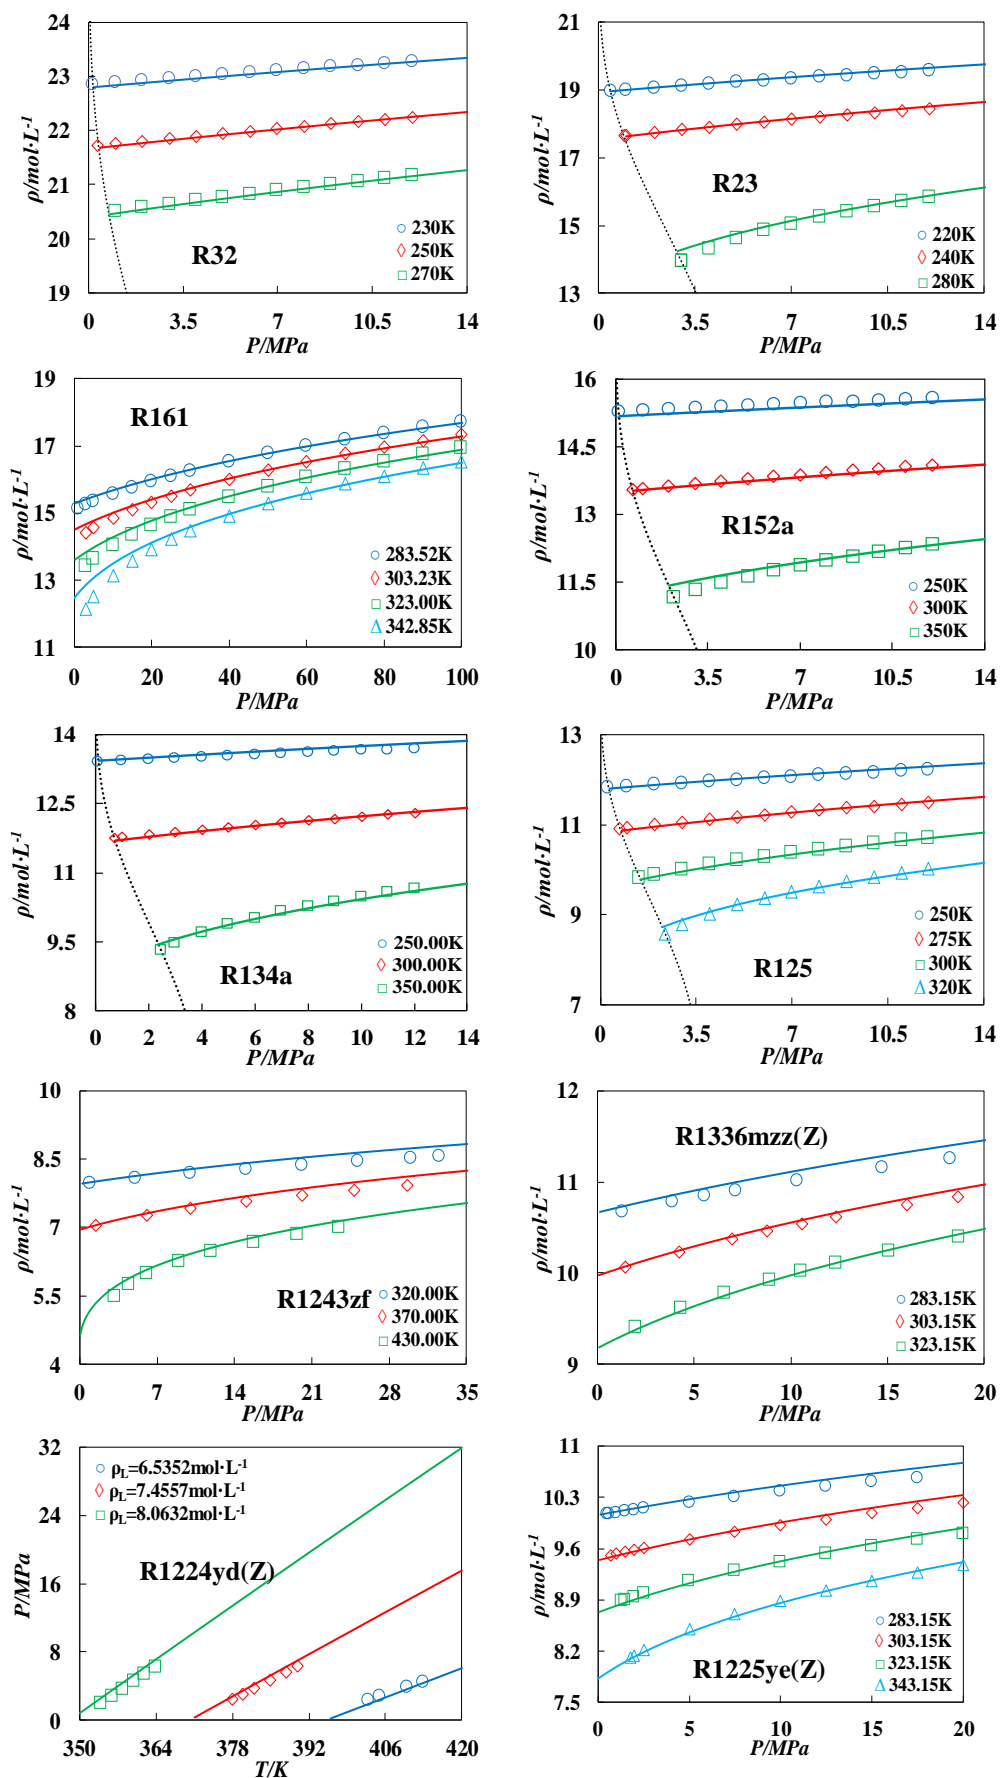

**Fig. S5.** Single-phase density of 3<sup>rd</sup> and 4<sup>th</sup> generation refrigerants predicted with polar soft-SAFT EoS (solid lines), compared to experimental data<sup>2,14-18</sup> (symbols).

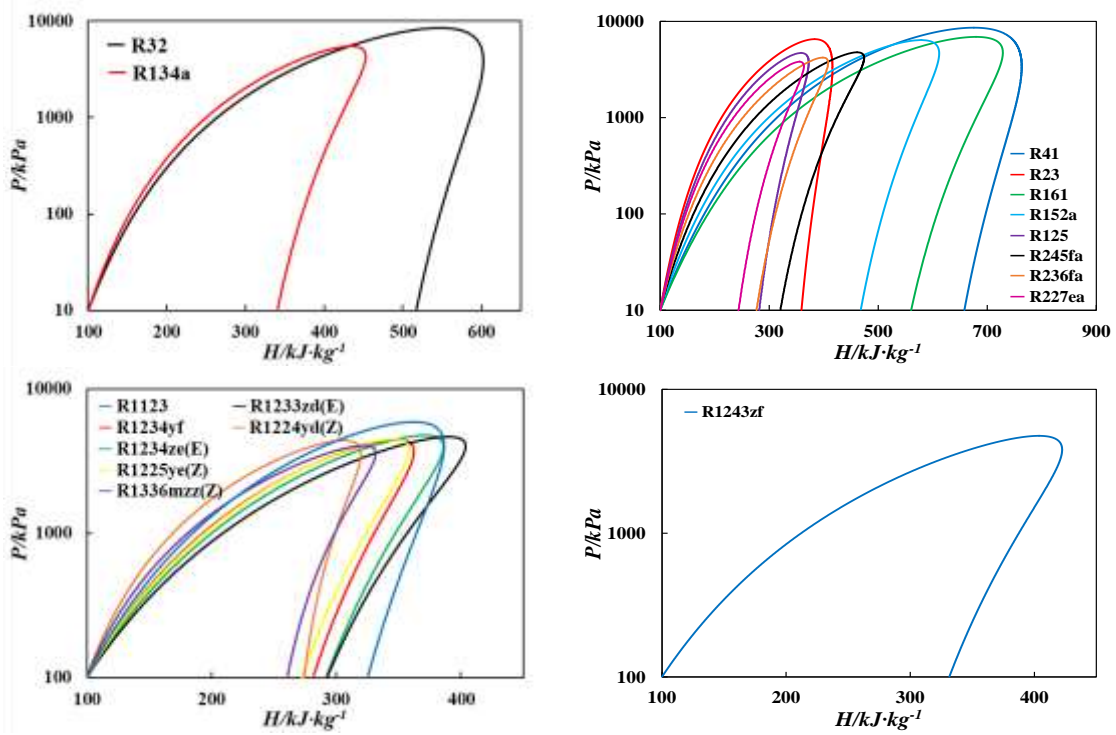

Fig. S6. Polar soft-SAFT predicted  $PH$  diagrams for the eighteen refrigerants modelled in this work.

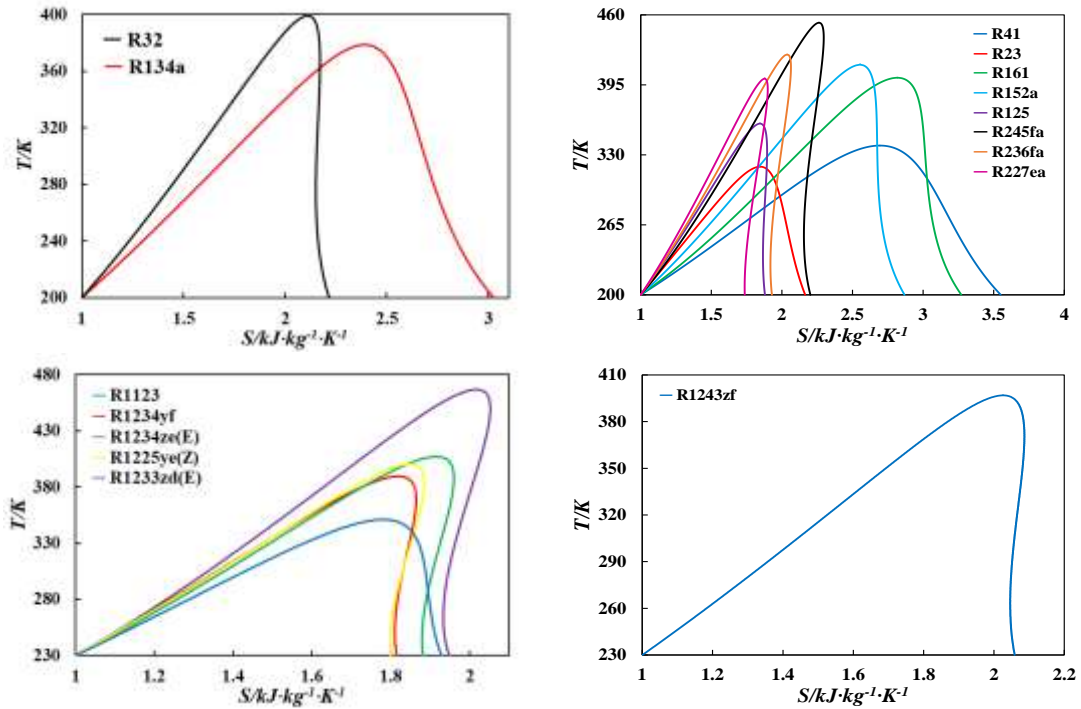

Fig. S7. Polar soft-SAFT predicted  $TS$  diagrams for sixteen refrigerants modeled in this work. Notice, predictions for R1336mzz(Z) and R1224yd(Z) cannot be obtained due to unavailability of ideal gas entropy for these refrigerants.

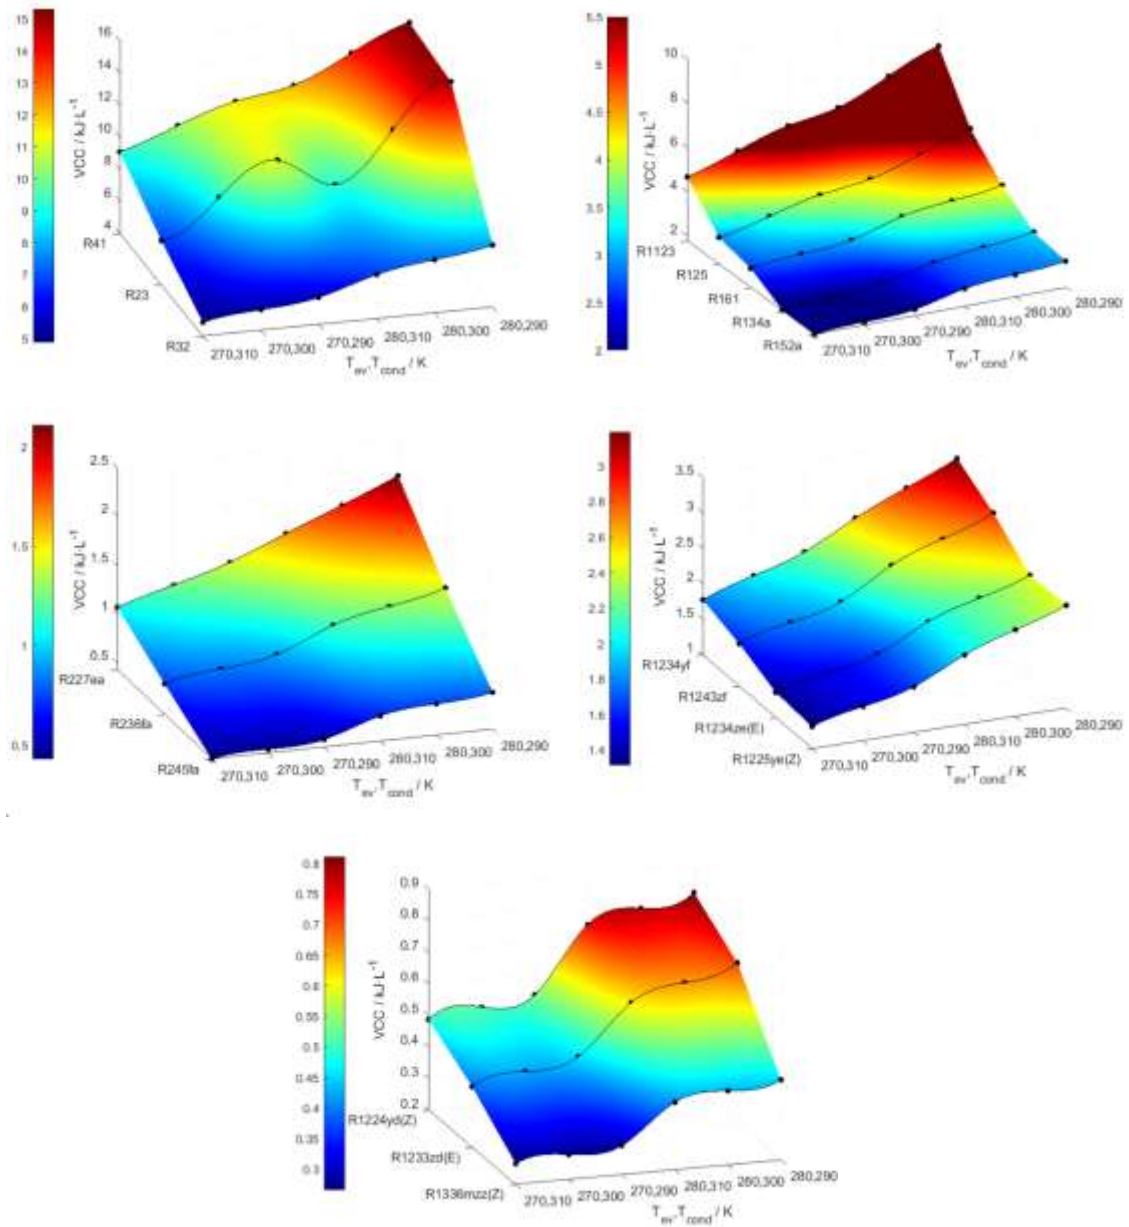

**Fig. S81.** VCC simulated at variable evaporator and condenser conditions for refrigerants modeled in this work



## References

- (1) Eyerer, S.; Dawo, F.; Kaindl, J.; Wieland, C.; Spliethoff, H. Experimental Investigation of Modern ORC Working Fluids R1224yd(Z) and R1233zd(E) as Replacements for R245fa. *Appl. Energy* **2019**, *240* (December 2018), 946–963. <https://doi.org/10.1016/j.apenergy.2019.02.086>.
- (2) Lemmon, E. W.; Huber, M. L.; McLinden, M. O. *NIST Reference Fluid Thermodynamic and Transport Properties — REFPROP, Version 9.0, National Institute of Standards and Technology, Gaithersburg, MD*; 2013.
- (3) HoneyWell's Genetron Properties software. *HoneyWell's Genetron Properties Software (Version 1.4)*; 2010.
- (4) Pinault, J.-L. Anthropogenic and Natural Radiative Forcing: Positive Feedbacks. *J. Mar. Sci. Eng.* **2018**, *6* (4), 146. <https://doi.org/10.3390/jmse6040146>.
- (5) Bobbo, S.; Nicola, G. Di; Zilio, C.; Brown, J. S.; Fedele, L. Low GWP Halocarbon Refrigerants: A Review of Thermophysical Properties. *Int. J. Refrig.* **2018**, *90*, 181–201. <https://doi.org/10.1016/j.ijrefrig.2018.03.027>.
- (6) Yang, J.; Gao, L.; Ye, Z.; Hwang, Y.; Chen, J. Binary-Objective Optimization of Latest Low-GWP Alternatives to R245fa for Organic Rankine Cycle Application. *Energy* **2021**, *217*, 119336. <https://doi.org/10.1016/j.energy.2020.119336>.
- (7) Yang, Z.; Feng, B.; Ma, H.; Zhang, L.; Duan, C.; Liu, B.; Zhang, Y.; Chen, S.; Yang, Z. Analysis of Lower GWP and Flammable Alternative Refrigerants. *Int. J. Refrig.* **2021**, *126*, 12–22. <https://doi.org/10.1016/j.ijrefrig.2021.01.022>.
- (8) Wu, X.; Dang, C.; Xu, S.; Hihara, E. State of the Art on the Flammability of Hydrofluoroolefin (HFO) Refrigerants. *Int. J. Refrig.* **2019**, *108*, 209–223. <https://doi.org/10.1016/j.ijrefrig.2019.08.025>.
- (9) Pàmies, J. C. Bulk and Interfacial Properties of Chain Fluids: A Molecular Modelling Approach. PhD Thesis, Universitat Rovira i Virgili, 2004.
- (10) Bell, I. H.; Wronski, J.; Quoilin, S.; Lemort, V. Pure and Pseudo-Pure Fluid Thermophysical Property Evaluation and the Open-Source Thermophysical Property Library CoolProp. *Ind. Eng. Chem. Res.* **2014**, *53*, 2498–2508. <https://doi.org/10.1021/ie4033999>.
- (11) Liu, Y.; Zhao, X.; Lv, S.; He, H. Isobaric Heat Capacity Measurements for R1234yf from 303 to 373 K and Pressures up to 12 MPa. *J. Chem. Eng. Data* **2017**, *62* (3), 1119–1124. <https://doi.org/10.1021/acs.jced.6b00959>.
- (12) Liu, Y.; Zhao, X.; He, H.; Wang, R. Heat Capacity of R1234ze(E) at Temperatures from 313 to 393 K and Pressures up to 10 MPa. *J. Chem. Eng. Data* **2018**, *63* (1), 113–118. <https://doi.org/10.1021/acs.jced.7b00713>.
- (13) Liu, Y.; Zhao, X. Measurement of the Heat Capacity of R1233zd(E). *Int. J. Refrig.* **2018**, *86*, 127–132. <https://doi.org/10.1016/j.ijrefrig.2017.11.015>.
- (14) Qi, H.; Fang, D.; Gao, K.; Meng, X.; Wu, J. Compressed Liquid Densities and Helmholtz Energy Equation of State for Fluoroethane (R161). *Int. J. Thermophys.* **2016**, *37* (6), 55. <https://doi.org/10.1007/s10765-016-2061-1>.
- (15) McLinden, M. O.; Akasaka, R. Thermodynamic Properties of Cis-1,1,1,4,4,4-Hexafluorobutene [R-1336mzz(Z)]: Vapor Pressure, (p, ρ, T) Behavior, and Speed of Sound Measurements and Equation of State. **2020**. <https://doi.org/10.1021/acs.jced.9b01198>.
- (16) Di Nicola, G.; Steven Brown, J.; Fedele, L.; Securo, M.; Bobbo, S.; Zilio, C. Subcooled Liquid Density Measurements and PvT Measurements in the Vapor Phase for 3,3,3-Trifluoroprop-1-Ene (R1243zf). *Int. J. Refrig.* **2013**, *36* (8), 2209–2215. <https://doi.org/10.1016/j.ijrefrig.2013.08.004>.
- (17) Higashi, Y.; Sakoda, N. Measurements of PvT Properties, Saturated Densities, and Critical Parameters for 3,3,3-Trifluoropropene (HFO1243zf). *J. Chem. Eng. Data* **2018**, *63* (10), 3818–3822. <https://doi.org/10.1021/acs.jced.8b00452>.
- (18) Brown, J. S.; Fedele, L.; Di Nicola, G.; Bobbo, S.; Coccia, G. Compressed Liquid Density and Vapor Phase PvT Measurements of Cis -1,2,3,3,3-Pentafluoroprop-1-Ene (R1225ye(Z)). *J. Chem. Eng. Data* **2015**, *60* (11), 3333–3340. <https://doi.org/10.1021/acs.jced.5b00562>.
